# Supplementary material
Source: PubMed Central journal article supplement (PMC9837456)
Supplement: BLOOD_BLD-2022-015854-C-mmc2.pdf [file BLOOD_BLD-2022-015854-C-mmc2.pdf]

| <b>Subject (Frequency)</b> | <b>IG Genes</b>                              | <b>Epigenetic Subtype</b> | <b>IGHV Hypermutation</b>              | <b>Mutated Drivers</b>                                                     | <b>Clinical Outcome</b>                                          |
|----------------------------|----------------------------------------------|---------------------------|----------------------------------------|----------------------------------------------------------------------------|------------------------------------------------------------------|
| Subset 1 (~2.4%)           | IGHV1,-5,-7<br>IGHD6-19<br>IGHJ4<br>IGKV1-39 | Naive-like                | U-CLL                                  | <i>NOTCH1</i><br><i>NFKBIE</i><br><i>TP53</i>                              | Very aggressive; median TTFT = 1.6 years                         |
| Subset 2 (~2.8%)           | IGHV3-21<br>IGHJ6<br>IGLV3-21                | Intermediate              | U-CLL and M-CLL                        | IGLV3-21 <sup>R110</sup><br><i>SF3B1</i><br>del(11q)<br>Rarely <i>TP53</i> | Very aggressive; median TTFT = 1.9 years                         |
| Subset 4 (~1%)             | IGHV4-34<br>IGHD5-18<br>IGHJ6<br>IGKV2-30    | Memory-like               | M-CLL<br>Ongoing somatic hypermutation | None                                                                       | Very indolent; median TTFT = 11 years                            |
| Subset 6 (~0.9%)           | IGHV1-69<br>IGHJ3                            | ND                        | U-CLL                                  | <i>NOTCH1</i>                                                              | Very aggressive; median TTFT = 1.6 years                         |
| Subset 8 (~0.5%)           | IGHV4-39<br>IGHD6-13<br>IGHJ5<br>IGKV1-39    | ND                        | U-CLL                                  | <i>NOTCH1</i><br>Trisomy 12<br>Rarely <i>TP53</i>                          | Very aggressive; median TTFT = 1.5 years; Richter transformation |

**Supplementary Table 2: Chronic lymphocytic leukemia (CLL) subgroups defined by stereotyped B-cell receptor.**

This table is reproduced from Nadeu F, Diaz-Navarro A, Delgado J, Puente XS, Campo E. Genomic and epigenomic alterations in chronic lymphocytic leukemia. *Annual Review of Pathology: Mechanisms of Disease*. 2020;15(1):149-177.<sup>1</sup>

Data from references <sup>2-4</sup>.

Abbreviations: del, deletion; IG, immunoglobulin; IGHV, immunoglobulin heavy variable; M-CLL, IGHV-mutated chronic lymphocytic leukemia; ND, no data; U-CLL, IGHV-unmutated chronic lymphocytic leukemia; TTFT, time to first treatment.

| <b>Gene</b>   | <b>Mutation</b> | <b>Impact</b>                  | <b>Agent</b>                               | <b>Reference(s)</b> |
|---------------|-----------------|--------------------------------|--------------------------------------------|---------------------|
| <i>BTK</i>    | C481S           | Kinase active, loss of binding | Covalent BTK i§                            | 5,6                 |
|               | C481G           | Kinase weak, loss of binding   | Covalent BTK i§                            | 7                   |
|               | C481F           | Kinase dead                    | Covalent BTK i§¶                           | 8,9                 |
|               | C481Y           | Kinase dead                    | Covalent BTK i§¶                           | 8,9                 |
|               | C481R           | Kinase dead                    | Covalent BTK i§¶&                          | 8,9                 |
|               | C481W           | Kinase dead                    | Covalent BTK i§¶&                          | 8,9                 |
|               | C481T           | Kinase active, loss of binding | Covalent BTK i§¶                           | 8,9                 |
|               | V416L           | Loss inhibition                | Non-covalent BTKi‡                         | 10                  |
|               | A428D           | Loss inhibition                | Non-covalent BTKi, Covalent BTKi           | 10                  |
|               | M437R           | Loss inhibition                | Non-covalent BTKi                          | 10                  |
|               | T474I           | Loss inhibition                | Non-covalent BTKi, Covalent BTKi           | 8,10                |
|               | T474S           | Loss inhibition                | Covalent BTKi§¶                            | 8                   |
|               | L528W           | Loss inhibition                | Non-covalent BTKi, Ibrutinib, Zanubrutinib | 8,10                |
| <i>PLCG2†</i> | T495C           | Gain of Function               | BTKi&                                      | 11                  |
|               | R742P           | Gain of Function               | BTKi                                       | 8                   |
|               | P664S           | Gain of Function               | BTKi                                       | 11                  |
|               | R665W           | Gain of Function               | BTKi                                       | 5,10                |
|               | R742P           | Gain of Function               | BTKi                                       | 8                   |
|               | S707P           | Gain of Function               | BTKi                                       | 8                   |
|               | S707F           | Gain of Function               | BTKi                                       | 8                   |
|               | S707Y           | Gain of Function               | BTKi <sup>∞</sup>                          | 12                  |
|               | L845F           | Gain of Function               | BTKi                                       | 5                   |
|               | L845G           | Gain of Function               | BTKi                                       | 11                  |
|               | L845fs          | Gain of Function               | BTKi                                       | 13                  |
|               | L845-846 del    | Gain of Function               | BTKi                                       | 11                  |
|               | D993G           | Gain of Function               | BTKi&                                      | 11                  |
|               | D993H           | Gain of Function               | BTKi                                       | 11                  |
|               | D993Y           | Gain of Function               | BTKi                                       | 11                  |
|               | D1140G          | Gain of Function               | BTKi                                       | 8                   |
|               | M1141R          | Gain of Function               | BTKi                                       | 11                  |
|               | M1141K          | Gain of Function               | BTKi                                       | 11                  |
|               | T495C           | Gain of Function               | BTKi&                                      | 11                  |
| <i>CARD11</i> | N280-L283del    | Gain of Function               | BTKi                                       | 14                  |
|               | D401Y           | Gain of Function               | BTKi                                       | 14                  |
|               | Various         | Gain of Function               | BTKi*                                      | 11                  |
| <i>BCL2</i>   | G101V           | Loss of binding                | Venetoclax                                 | 15,16               |
|               | D103Y           | Loss of binding                | Venetoclax                                 | 17                  |

|                |  |                      |                                    |    |
|----------------|--|----------------------|------------------------------------|----|
| <i>SMARCA4</i> |  | Intrinsic resistance | Ibrutinib + venetoclax combination | 18 |
| <i>ARID2</i>   |  | Intrinsic resistance | Venetoclax                         | 18 |

**Supplementary Table 3: Negative impact of gene mutations on response to targeted agents in chronic lymphocytic leukemia (CLL)**

§Covalent BTKi tested include: ibrutinib, acalabrutinib, zanubrutinib

‡Non-covalent BTKi tested include: pirtobrutinib, fenebrutinib, vecabrutinib, nemtabrutinib

¶Information on non-covalent BTKi not available

&Based on constructs of these mutations, not reported in patients

†Not all *PLCG2* mutations have been reported with non-covalent BTKi but are included based on mechanism of action

∞Also described as a germline mutation<sup>19</sup>

\**CARD11* mutation is uncommon in CLL. Additional gain-of-function mutations of *CARD11* in MCL are associated with broad resistance to BTKi.

\*\**SMARCA4* and *ARID2* mutations have been associated with resistance in mantle cell lymphoma, not yet described in CLL

| <b>Technique</b>                     | <b>Profiling</b>                                                                                   | <b>Sample material</b>      | <b>Coverage</b>         | <b>Refs</b> |
|--------------------------------------|----------------------------------------------------------------------------------------------------|-----------------------------|-------------------------|-------------|
| <b>scRNA-seq</b>                     | Transcriptome                                                                                      | Viable cells                | Genome-wide             | 20          |
| <b>Spatial-seq</b>                   | Topographical transcriptome                                                                        | Frozen tissue               | Genome-wide             | 21-23       |
| <b>snRNA-seq</b>                     | Transcriptome                                                                                      | Viable nuclei               | Genome-wide             | 24,25       |
| <b>CITE-seq</b><br><b>ECCITE-seq</b> | Cellular indexing of transcriptomes and epitopes by sequencing                                     | Viable cells                | Genome-wide             | 26,27       |
| <b>GoT</b>                           | Genotyping of transcripts                                                                          | Viable cells                | Targeted mutations      | 28          |
| <b>scDNA-seq</b>                     | Genome                                                                                             | Viable cells                | Genome-wide or targeted | 29,30       |
| <b>scATAC-seq</b>                    | Chromatin accessibility                                                                            | Viable cells, frozen tissue | Genome-wide             | 31          |
| <b>scDName-seq</b>                   | Epigenome                                                                                          | Viable cells                | Genome-wide             | 32          |
| <b>CytoF</b>                         | Protein/epitopes                                                                                   | Viable cells                | Targeted (~40 markers)  | 33          |
| <b>Spatial-proteomics</b>            | Topographical protein/epitope mapping (IMC, CODEX multiplex imaging, MIBI, CyCIF imaging, MxIF,..) | Frozen, FFPE tissue         | targeted (~50 markers)  | 34-37       |

**Supplementary Table 4: Single cell technologies**

Abbreviations: ATACseq: assay for transposase-accessible chromatin with high-throughput sequencing; CITE: cellular indexing of transcriptomes and epitopes by sequencing; CODEX: codetection by indexing;; CyCIF: cyclic immunofluorescence; CyToF: cytometry by time of flight; DName-seq: DNA methylation sequencing; ECCITE: expanded CRISPR-compatible CITE-seq; IMC: imaging mass spectrometry; MIBI: multiplex ion beam imaging; MxIF: multiplexed immunofluorescence; scRNA-seq: single cell RNA-sequencing; snRNA-seq: single nucleus RNA sequencing

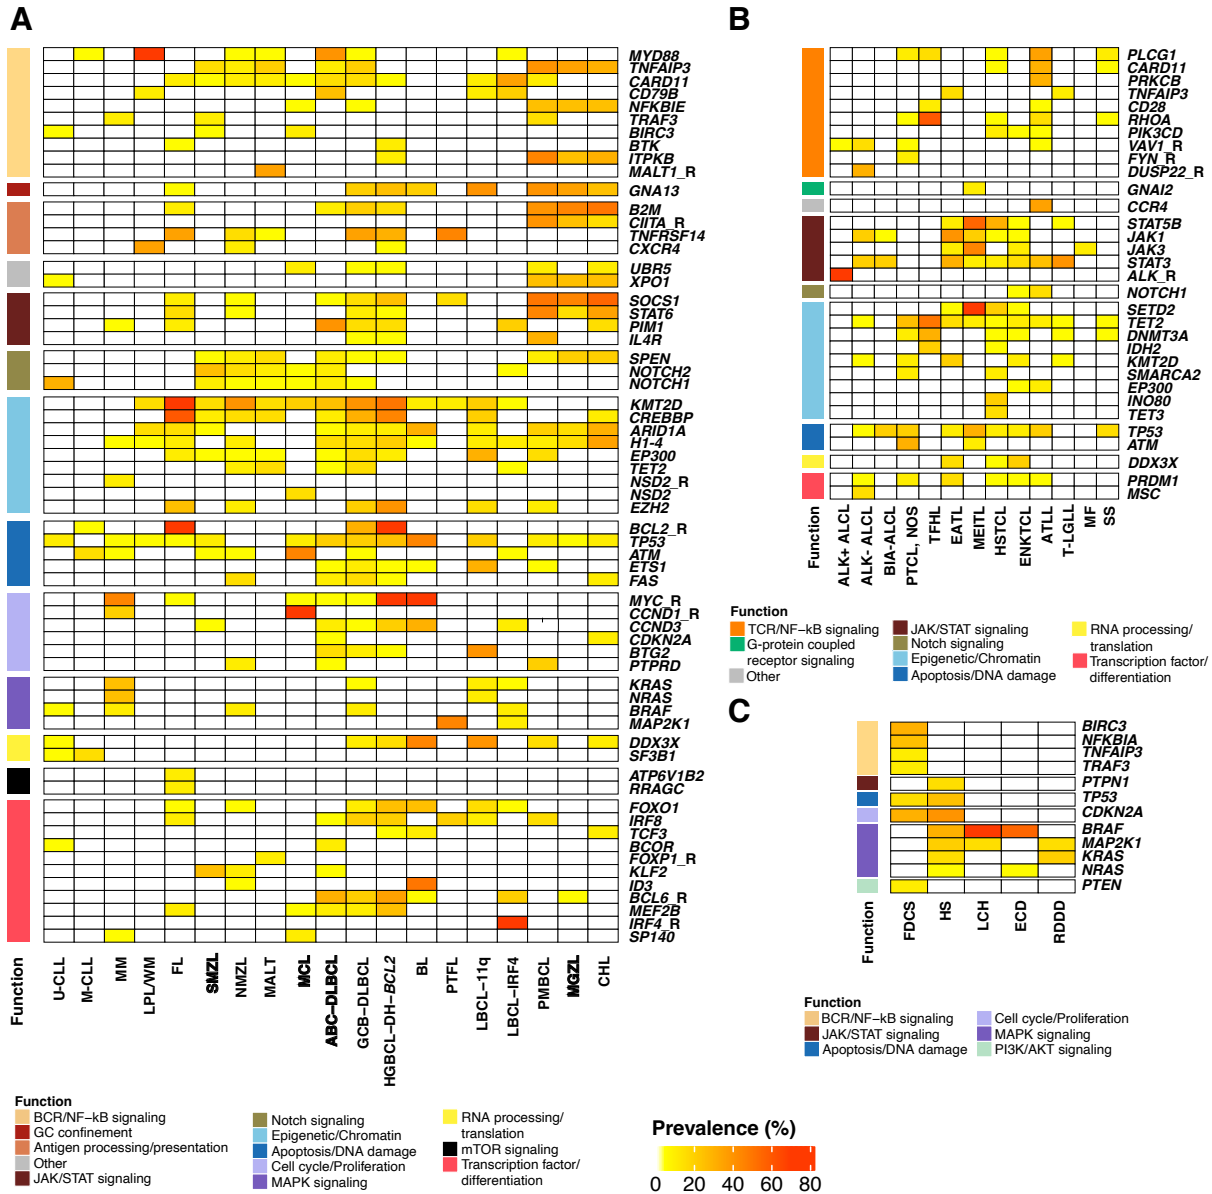

**Supplemental Figure 1: Mutational landscape of mature lymphoid and histiocytic and dendritic cell neoplasms.**

Frequency of selected single nucleotide variants/indels and rearrangements (R) are shown in the form of a heat map for mature B-cell neoplasms (Panel A), NK- and T-cell neoplasms (Panel B) and histiocytic and dendritic neoplasms (Panel C) along with inferred functional groups. Only genes referenced in the main text where there is a mutational frequency of at least 10% observed in one or more neoplasm are displayed - see **Table S1** for the full list of genes. The mutational frequencies were sourced from the literature and unpublished data, noting that different sequencing technologies and mutation callers were used across the studies. Abbreviations: U-CLL: IGHV-unmutated chronic lymphocytic leukemia; M-CLL: IGHV-mutated CLL; MM: multiple myeloma; LPL/WM: lymphoplasmacytic lymphoma/Waldenström macroglobulinemia; FL: follicular lymphoma; SMZL: splenic marginal zone lymphoma; NMZL: nodal MZL; MALT: mucosa-associated lymphoid tissue lymphoma; MCL: mantle cell lymphoma;

ABC-DLBCL: activated B-cell-like diffuse large B-cell lymphoma; GCB-DLBCL: germinal center B-cell-like DLBCL; HGBCL-DH-*BCL2*: high-grade B-cell lymphoma with *MYC* and *BCL2* rearrangements; BL: Burkitt lymphoma; PTF: pediatric-type FL; LBCL-11q: large B-cell lymphoma with 11q aberration; LBCL-*IRF4*: LBCL with *IRF4* rearrangement; PMBCL: primary mediastinal large B-cell lymphoma; MGZL: mediastinal gray-zone lymphoma; CHL: classic Hodgkin lymphoma; ALK+ ALCL: ALK-positive anaplastic large cell lymphoma; ALK- ALCL: ALK-negative ALCL; BIA-ALCL: breast implant-associated ALCL; PTCL, NOS: peripheral T-cell lymphoma, not otherwise specified; TFHL: follicular helper T-cell lymphoma; EATL: enteropathy-associated T-cell lymphoma; MEITL: monomorphic epitheliotropic intestinal T-cell lymphoma; HSCTL: hepatosplenic T-cell lymphoma; ENKTCL: extranodal NK/T-cell lymphoma; ATLL: adult T-cell leukemia/lymphoma; T-LGLL: T-cell large granular lymphocytic leukemia; MF: mycosis fungoides; SS: Sezary syndrome; FDCS: follicular dendritic cell sarcoma; HS: histiocytic sarcoma; LCH: Langerhans cell histiocytosis; ECD: Erdheim-Chester disease; RDDD: Rosai-Dorfman-DeStombes disease.

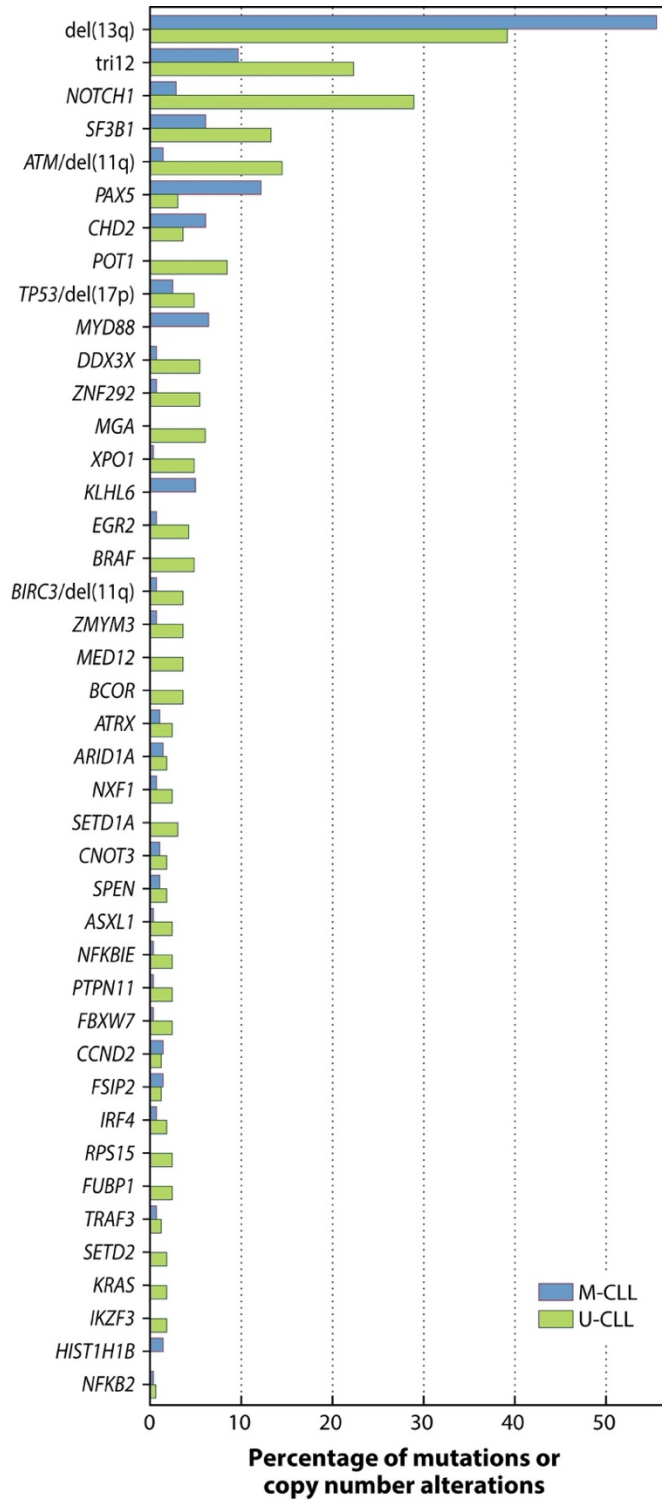

**Supplementary Figure 2: Frequency of cytogenetic and genomic lesions in chronic lymphocytic leukemia (CLL) stratified by IGHV mutation status.**

This figure is reproduced from Nadeu F, Diaz-Navarro A, Delgado J, Puente XS, Campo E. Genomic and epigenomic alterations in chronic lymphocytic leukemia. *Annual Review of Pathology: Mechanisms of Disease*. 2020;15(1):149-177.

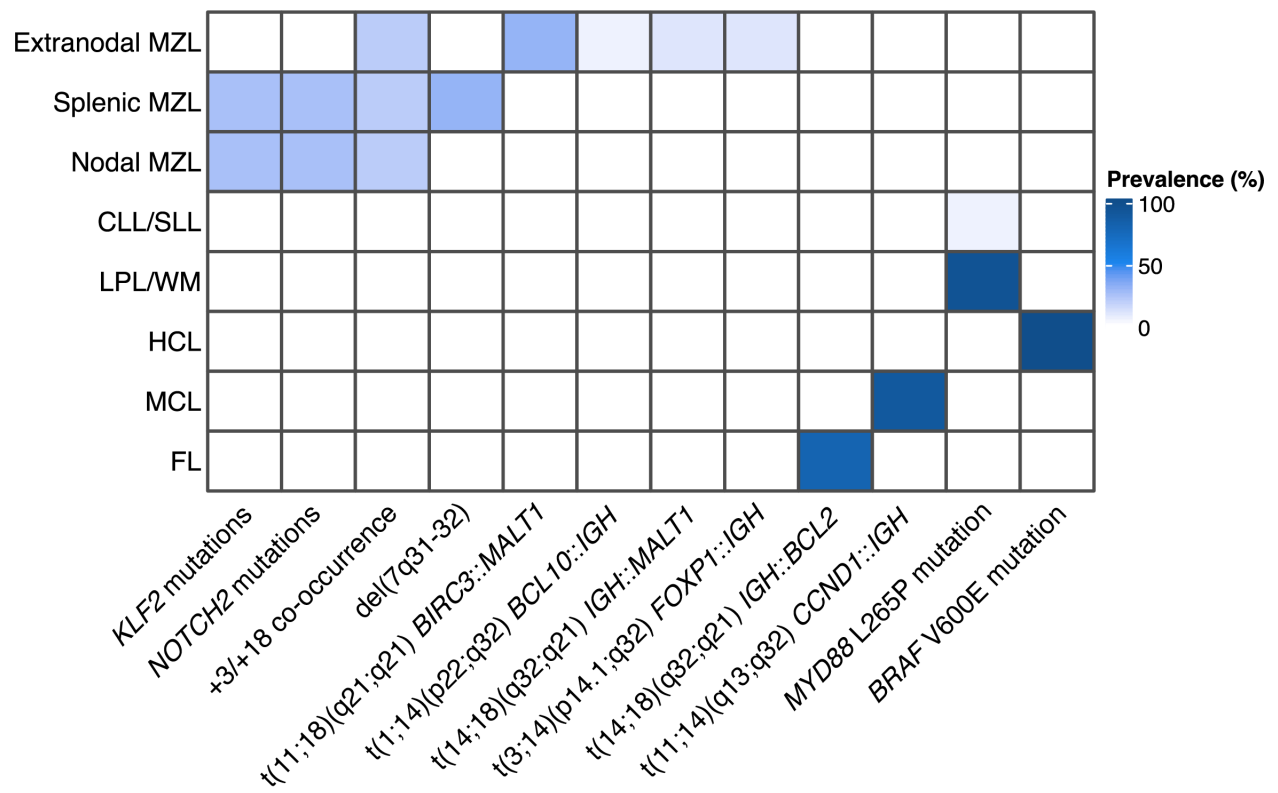

**Supplementary Figure 3: Genomic features that differentiate marginal zone lymphomas from other small B-cell lymphomas.**



## References:

1. Nadeu F, Diaz-Navarro A, Delgado J, Puente XS, Campo E. Genomic and epigenomic alterations in chronic lymphocytic leukemia. *Annu Rev Pathol.* 2020;15(1):149-177.
2. Stamatopoulos K, Agathangelidis A, Rosenquist R, Ghia P. Antigen receptor stereotypy in chronic lymphocytic leukemia. *Leukemia.* 2017;31(2):282-291.
3. Strefford JC, Sutton LA, Baliakas P, et al. Distinct patterns of novel gene mutations in poor-prognostic stereotyped subsets of chronic lymphocytic leukemia: the case of SF3B1 and subset #2. *Leukemia.* 2013;27(11):2196-2199.
4. Lesley-Ann S, Emma Y, Panagiotis B, et al. Different spectra of recurrent gene mutations in subsets of chronic lymphocytic leukemia harboring stereotyped B-cell receptors. *Haematologica.* 2016;101(8):959-967.
5. Woyach JA, Furman RR, Liu TM, et al. Resistance mechanisms for the Bruton's tyrosine kinase inhibitor ibrutinib. *N Engl J Med.* 2014;370(24):2286-2294.
6. Furman RR, Cheng S, Lu P, et al. Ibrutinib Resistance in Chronic Lymphocytic Leukemia. *N Engl J Med.* 2014;370(24):2352-2354.
7. Quinquenel A, Fornecker LM, Letestu R, et al. Prevalence of BTK and PLCG2 mutations in a real-life CLL cohort still on ibrutinib after 3 years: a FILO group study. *Blood.* 2019;134(7):641-644.
8. Maddocks KJ, Ruppert AS, Lozanski G, et al. Etiology of Ibrutinib Therapy Discontinuation and Outcomes in Patients With Chronic Lymphocytic Leukemia. *JAMA Oncol.* 2015;1(1):80-87.
9. Hamasy A, Wang Q, Blomberg KEM, et al. Substitution scanning identifies a novel, catalytically active ibrutinib-resistant BTK cysteine 481 to threonine (C481T) variant. *Leukemia.* 2017;31(1):177-185.
10. Wang E, Mi X, Thompson MC, et al. Mechanisms of resistance to noncovalent Bruton's Tyrosine Kinase inhibitors. *N Engl J Med.* 2022;386(8):735-743.
11. Smith CIE, Burger JA. Resistance mutations to BTK inhibitors originate from the NF- $\kappa$ B but not from the PI3K-RAS-MAPK arm of the B cell receptor signaling pathway. *Front Immunol.* 2021;12:689472.
12. Liu TM, Woyach JA, Zhong Y, et al. Hypermorphic mutation of phospholipase C,  $\gamma$ 2 acquired in ibrutinib-resistant CLL confers BTK independency upon B-cell receptor activation. *Blood.* 2015;126(1):61-68.
13. Maddocks KJ, Ruppert AS, Lozanski G, et al. Etiology of Ibrutinib Therapy Discontinuation and Outcomes in Patients With Chronic Lymphocytic Leukemia. *JAMA Oncology.* 2015;1(1):80.
14. Kanagal-Shamanna R, Jain P, Patel KP, et al. Targeted multigene deep sequencing of Bruton tyrosine kinase inhibitor-resistant chronic lymphocytic leukemia with disease progression and Richter transformation. *Cancer.* 2019;125(4):559-574.
15. Blombery P, Anderson MA, Gong JN, et al. Acquisition of the Recurrent Gly101Val Mutation in BCL2 Confers Resistance to Venetoclax in Patients with Progressive Chronic Lymphocytic Leukemia. *Cancer Discov.* 2019;9(3):342-353.

16. Birkinshaw RW, Gong J-n, Luo CS, et al. Structures of BCL-2 in complex with venetoclax reveal the molecular basis of resistance mutations. *Nat Commun.* 2019;10(1):2385.
17. Eugen T, William C, Anna D, et al. Venetoclax resistance and acquired BCL2 mutations in chronic lymphocytic leukemia. *Haematologica.* 2019;104(9):e434-e437.
18. Agarwal R, Chan YC, Tam CS, et al. Dynamic molecular monitoring reveals that SWI-SNF mutations mediate resistance to ibrutinib plus venetoclax in mantle cell lymphoma. *Nat Med.* 2019;25(1):119-129.
19. Zhou Q, Lee GS, Brady J, et al. A hypermorphic missense mutation in PLCG2, encoding phospholipase C $\gamma$ 2, causes a dominantly inherited autoinflammatory disease with immunodeficiency. *Am J Hum Genet.* 2012;91(4):713-720.
20. Tang F, Barbacioru C, Wang Y, et al. mRNA-Seq whole-transcriptome analysis of a single cell. *Nat Methods.* 2009;6(5):377-382.
21. Moses L, Pachter L. Museum of spatial transcriptomics. *Nat Methods.* 2022.
22. Ståhl PL, Salmén F, Vickovic S, et al. Visualization and analysis of gene expression in tissue sections by spatial transcriptomics. *Science.* 2016;353(6294):78-82.
23. Marx V. Method of the Year: spatially resolved transcriptomics. *Nat Methods.* 2021;18(1):9-14.
24. Slyper M, Porter CBM, Ashenberg O, et al. A single-cell and single-nucleus RNA-Seq toolbox for fresh and frozen human tumors. *Nat Med.* 2020;26(5):792-802.
25. Denisenko E, Guo BB, Jones M, et al. Systematic assessment of tissue dissociation and storage biases in single-cell and single-nucleus RNA-seq workflows. *Genome Biol.* 2020;21(1):130.
26. Stoeckius M, Hafemeister C, Stephenson W, et al. Simultaneous epitope and transcriptome measurement in single cells. *Nat Methods.* 2017;14(9):865-868.
27. Mimitou EP, Cheng A, Montalbano A, et al. Multiplexed detection of proteins, transcriptomes, clonotypes and CRISPR perturbations in single cells. *Nat Methods.* 2019;16(5):409-412.
28. Nam AS, Kim KT, Chaligne R, et al. Somatic mutations and cell identity linked by Genotyping of Transcriptomes. *Nature.* 2019;571(7765):355-360.
29. Navin N, Kendall J, Troge J, et al. Tumour evolution inferred by single-cell sequencing. *Nature.* 2011;472(7341):90-94.
30. Miles LA, Bowman RL, Merlinsky TR, et al. Single-cell mutation analysis of clonal evolution in myeloid malignancies. *Nature.* 2020;587(7834):477-482.
31. Buenrostro JD, Wu B, Litzenburger UM, et al. Single-cell chromatin accessibility reveals principles of regulatory variation. *Nature.* 2015;523(7561):486-490.
32. Chaligne R, Gaiti F, Silverbush D, et al. Epigenetic encoding, heritability and plasticity of glioma transcriptional cell states. *Nat Genet.* 2021;53(10):1469-1479.
33. Bandura DR, Baranov VI, Ornatsky OI, et al. Mass cytometry: technique for real time single cell multitarget immunoassay based on inductively coupled plasma time-of-flight mass spectrometry. *Anal Chem.* 2009;81(16):6813-6822.
34. Giesen C, Wang HAO, Schapiro D, et al. Highly multiplexed imaging of tumor tissues with subcellular resolution by mass cytometry. *Nat Methods.* 2014;11(4):417-422.

35. Schürch CM, Bhate SS, Barlow GL, et al. Coordinated Cellular Neighborhoods Orchestrate Antitumoral Immunity at the Colorectal Cancer Invasive Front. *Cell*. 2020;182(5):1341-1359.e1319.
36. Angelo M, Bendall SC, Finck R, et al. Multiplexed ion beam imaging of human breast tumors. *Nat Med*. 2014;20(4):436-442.
37. Lin JR, Fallahi-Sichani M, Sorger PK. Highly multiplexed imaging of single cells using a high-throughput cyclic immunofluorescence method. *Nat Commun*. 2015;6:8390.
